# Supplementary material
Source: Springer Nature journal article supplement (https://www.springermedizin.de/resource/supplementary/12974_2011_417_MOESM2_ESM.pdf/9601260)

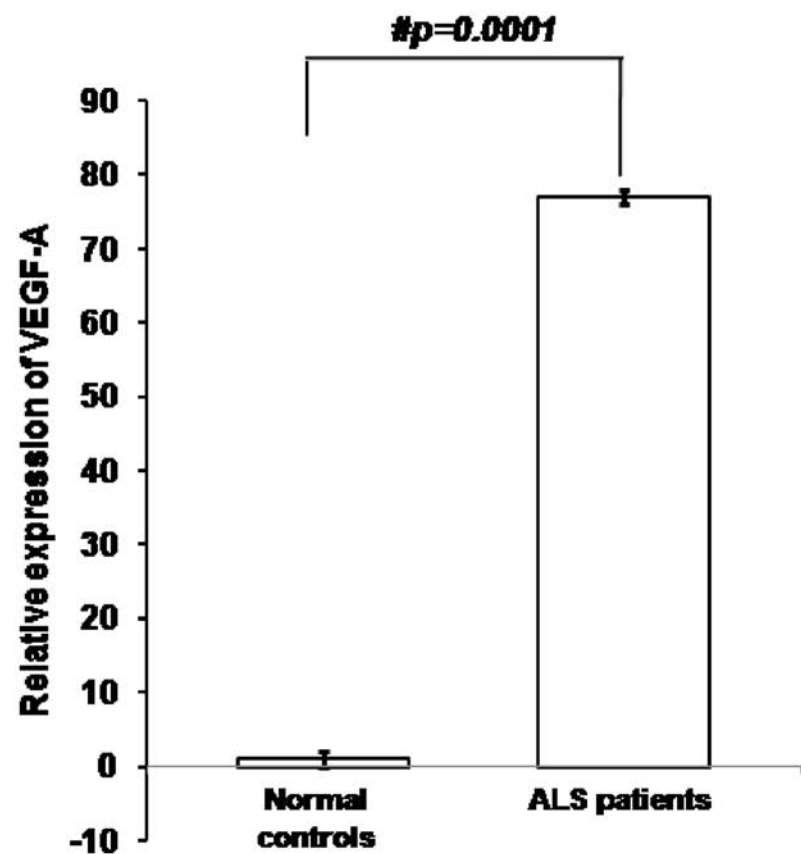

**A**

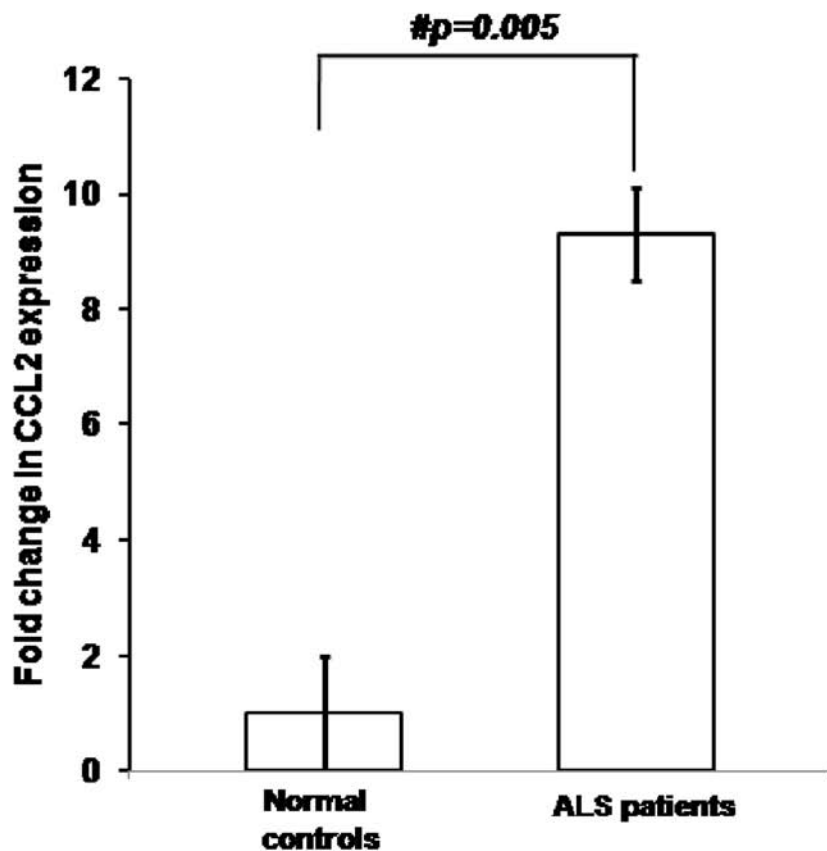

**B**

Supplement: MOESM2 [file 9601260]
